# Supplementary material for: Aromaticity, Coulomb repulsion, π delocalization or strain: who is who in endohedral metallofullerene stability?
Source: Royal Society of Chemistry journal article supplement (doi:10.1039/c8cp06707d), 2018-11-23
Supplement: c8cp06707d1.pdf [file c8cp06707d1.pdf]

# Electronic Supplementary Information for “Aromaticity, Coulomb repulsion, $\pi$ delocalization or strain: who is who in endohedral metallofullerene stability?”

Yang Wang,<sup>†,‡,¶</sup> Sergio Díaz-Tendero,<sup>‡,¶,§</sup> Manuel Alcamí,<sup>‡,¶,||</sup> and Fernando  
Martín<sup>\*,‡,||,§,⊥</sup>

<sup>†</sup>*School of Chemistry and Chemical Engineering, Yangzhou University, Yangzhou, Jiangsu  
225002, China*

<sup>‡</sup>*Departamento de Química, Módulo 13, Universidad Autónoma de Madrid, 28049 Madrid,  
Spain*

<sup>¶</sup>*Institute for Advanced Research in Chemical Sciences (IAdChem), Universidad Autónoma  
de Madrid, 28049 Madrid, Spain*

<sup>§</sup>*Condensed Matter Physics Center (IFIMAC), Universidad Autónoma de Madrid, 28049  
Madrid, Spain*

<sup>||</sup>*Instituto Madrileño de Estudios Avanzados en Nanociencia (IMDEA-Nanociencia),  
Cantoblanco, 28049 Madrid, Spain*

<sup>⊥</sup>*Donostia International Physics Center (DIPC), Paseo Manuel de Lardizabal 4, 20018  
Donostia-San Sebastián, Spain*

E-mail: [fernando.martin@uam.es](mailto:fernando.martin@uam.es)

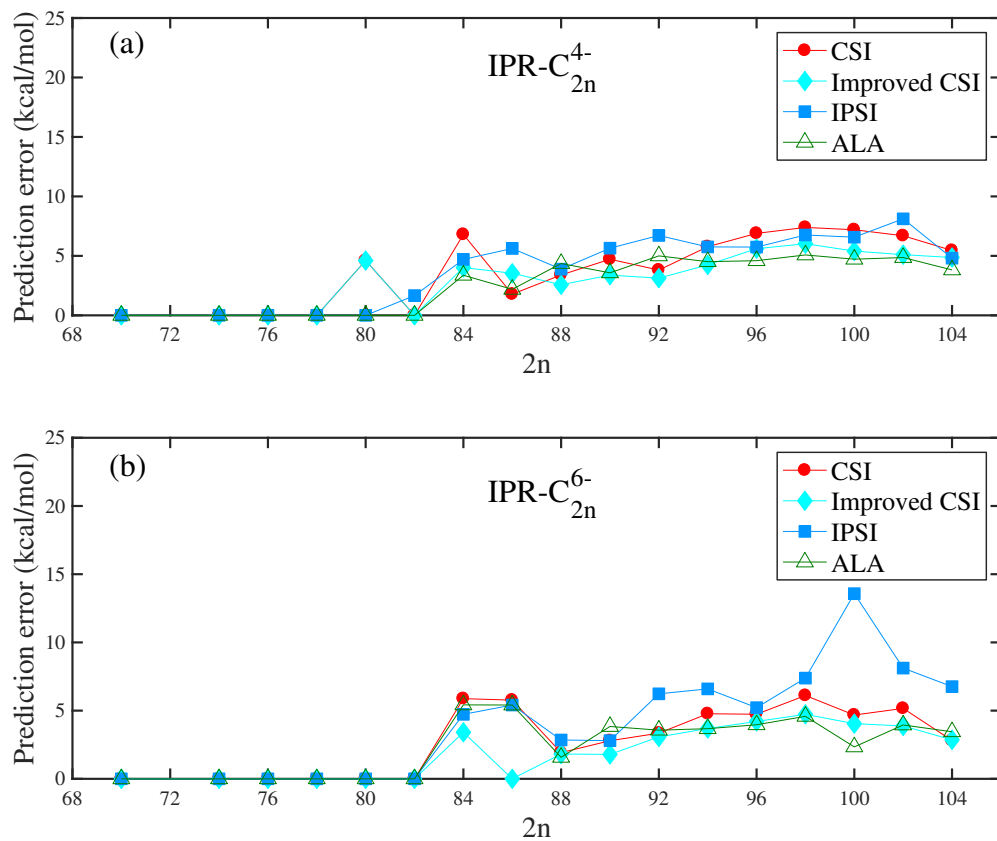

**Figure S1.** Prediction error for the CSI (red circles), improved CSI (cyan diamonds), ALA (green triangles) and IPSI (blue squares) models for the IPR fullerene anions (a)  $\text{C}_{2n}^{4-}$  and (b)  $\text{C}_{2n}^{6-}$ , with cage sizes  $2n = 70\text{--}104$ .

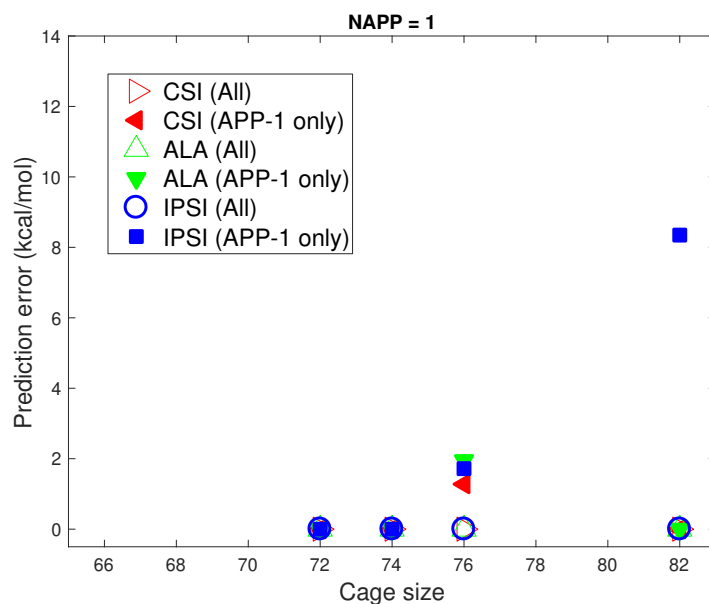

**Figure S2.** Prediction error for the indicators CSI, ALA and IPSI for fullerene anions  $C_{2n}^{6-}$  ( $2n = 66-82$ ). Empty symbols correspond to the prediction error calculated by including all non-IPR isomers (with up to 3 APPs), whose relative energy is lower than 30 kcal/mol. Filled symbols represent the prediction error calculated by considering only the isomers with one APP, within the 30 kcal/mol window. The reference energy of the latter is that of the most stable one among all isomers with one APP.

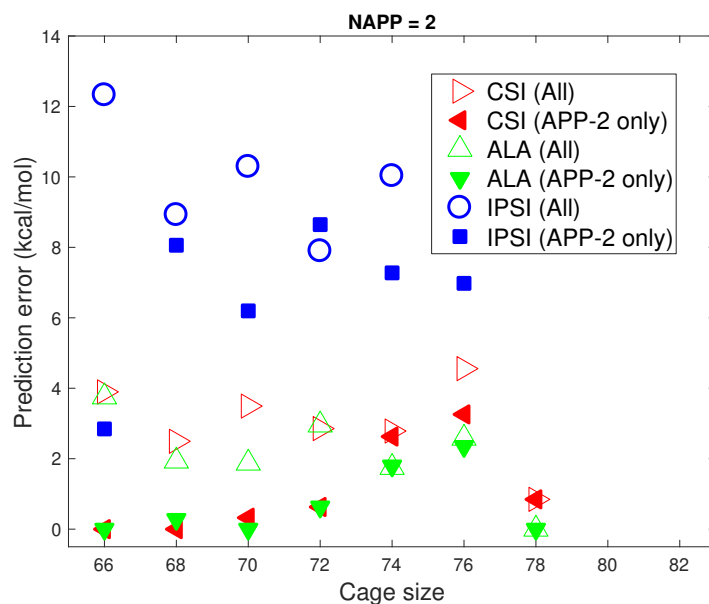

**Figure S3.** Prediction error for the indicators CSI, ALA and IPSI for fullerene anions  $C_{2n}^{6-}$  ( $2n = 66-82$ ). Empty symbols correspond to the prediction error calculated by including all non-IPR isomers (with up to 3 APPs), whose relative energy is lower than 30 kcal/mol. Filled symbols represent the prediction error calculated by considering only the isomers with 2 APPs, within the 30 kcal/mol window. The reference energy of the latter is that of the most stable one among all isomers with 2 APPs.

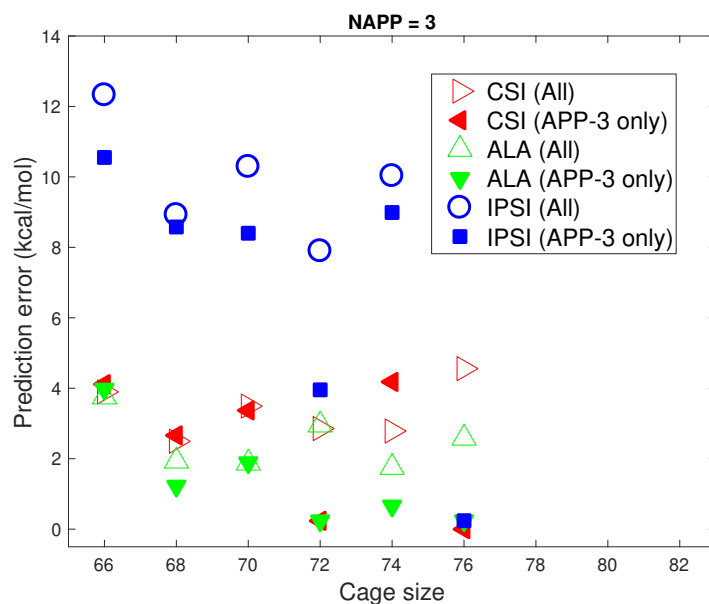

**Figure S4.** Prediction error for the indicators CSI, ALA and IPSI for fullerene anions  $C_{2n}^{6-}$  ( $2n = 66-82$ ). Empty symbols correspond to the prediction error calculated by including all non-IPR isomers (with up to 3 APPs), whose relative energy is lower than 30 kcal/mol. Filled symbols represent the prediction error calculated by considering only the isomers with 3 APPs, within the 30 kcal/mol window. The reference energy of the latter is that of the most stable one among all isomers with 3 APPs.
